# Supplementary material for: One-Year Outcomes and Trends over Two Eras of Transcatheter Aortic Valve Implantation in Real-World Practice
Source: MDPI journal article supplement (doi:10.3390/jcm11051164), 2022-02-22
Supplement: s1 [file s1]

# One-Year Outcomes and Trends over Two Eras of Transcatheter Aortic Valve Implantation in Real-World Practice

*Supplementary File S1*

## Statistical analysis

Categorical variables are reported as counts and percentages. Continuous variables are reported as medians and interquartile ranges (IQRs). Continuous variables were compared with the t-test or Mann-Whitney U test for paired samples, and categorical variables were compared with the chi-square statistics, Fischer's exact or McNemar tests for paired samples as appropriate.

To account for the non-randomized design of our study, two adjustment methods based on propensity score (PS) were used. The PS was estimated using a logistic regression model according to a non-parsimonious approach. Variables included in the PS are reported in **Supplementary Figure S1**. Inverse probability of treatment weighting (IPTW) based on propensity score (PS) was used as primary tool to adjust for baseline confounding variables between comparing groups. One-to-one PS matching with the nearest neighbor method was used as sensitivity analysis. A caliper width of 0.1 x standard deviation (SD) of PS logit was used to select two paired samples with minimum imbalance in baseline characteristics. Balance between baseline characteristics was estimated using standardized mean difference (SMD) and values <0.1 were considered an acceptable balance between covariates (**Supplementary Figure S1**).

Time-to-event curve for primary outcome was constructed with the Kaplan-Meier estimates in PSM cohorts as well as adjusted by the IPTW. Hazard ratio (HR) for all-cause death was calculated using the IPTW-adjusted Cox proportional-hazard regression model. Cumulative incidence functions of stroke, MI, repeat hospitalization for HF and PPI were estimated using a competing-risk regression using Fine and Gray method adjusted by the IPTW. In these analyses, death has been considered a competing event because patients under observation might have died preventing the event of interest to occur.

Finally, independent predictors of all-cause death were assessed using IPTW-adjusted multivariable logistic regression model. All statistical tests were performed two-tailed, and a  $p$ -value <0.05 was considered as the threshold for statistical significance. Statistical analyses were performed using R 3.4 (R Foundation for Statistical Computing, Vienna, Austria) software equipped with "twang" package.

## Results of additional analyses

A secondary analysis was conducted considering only patients undergoing transfemoral (TF) TAVI, and treated with first generation CoreValve (Medtronic Inc, Minneapolis) and SAPIEN XT (Edwards Lifesciences, Irvine, CA) devices in the OBSERVANT study ( $n = 1430$ ), and with new generation Evolut R/PRO (Medtronic Inc, Minneapolis), SAPIEN 3 (Edwards Lifesciences, Irvine, CA), Engager (Edwards Lifesciences, Irvine, CA), Acurate Neo TF (Boston Scientific, Marlborough, MA), Portico (Abbott Cardiovascular, Chicago, Illinois), Lotus (Boston Scientific, Marlborough, MA) devices in the OBSERVANT II study ( $n = 2511$ ).

After IPTW adjustment, OBSERVANT II patients had a lower risk of all-cause death [10.8% vs. 15.0%, HR 0.71 (95% CI 0.57–0.88);  $p < 0.01$ ] at 1 year, compared to OBSERVANT patients (**Supplementary Table S4 and Supplementary Figure S2**).

The benefit in terms of all-cause death was mostly confined within the first 30 days [2.2% vs. 4.3%, HR 0.52 (95% CI 0.34–0.77);  $p < 0.01$ ], being not statistically significant thereafter [8.7% vs. 11.1%, HR 0.79 (0.62–1.01);  $p = 0.06$ ] (**Supplementary Table S5 and Supplementary Figure S2**).

The risk of rehospitalization for HF [14.6% vs. 19.4%, HR 0.73 (95% CI 0.61–0.88);  $p < 0.01$ ] was lower for OBSERVANT II patients, whereas rates of stroke [3.4% vs. 3.7%, HR 0.92 (95% CI 0.62–1.36);  $p = 0.68$ ], PPI [17.4% vs. 18.7%, HR 0.94 (95% CI 0.78–1.13);  $p = 0.50$ ] and MI [1.7% vs. 1.8%, HR 0.91 (95% CI 0.54–1.53);  $p = 0.71$ ] were similar between patients of OBSERVANT II and OBSERVANT studies at 1 year (**Supplementary Table S4 and Supplementary Figure S3**).

In a pre-specified exploratory analysis, patients undergoing TF-TAVI with first generation CoreValve or SAPIEN XT transcatheter aortic valves (TAVs) in the OBSERVANT study were compared with those treated with the respective device iterations Evolut R/PRO and SAPIEN 3 in the OBSERVANT II study.

At 1 year, no difference was observed between patients treated with SAPIEN family valves in OBSERVANT II and OBSERVANT studies in terms of all-cause death [9.7% vs. 11.9%; HR 0.80 (95% CI 0.47–1.36);  $p = 0.42$ ], whereas patients treated with new generation Evolut R/PRO valves in the OBSERVANT II study had a lower risk of all-cause death [12.3% vs. 16.5%, HR 0.73 (95% CI 0.55–0.96);  $p = 0.03$ ] compared to those receiving first generation CoreValve TAV in the OBSERVANT study (**Supplementary Table S6 and Supplementary Figure S4**).

Finally, in the IPTW-adjusted multivariable logistic regression analysis, undergoing TAVI in the period of OBSERVANT II study was found to be a protective factor of all-cause death [0.79 (95% CI 0.60–1.05);  $p = 0.02$ ] (**Supplementary Table S7**).

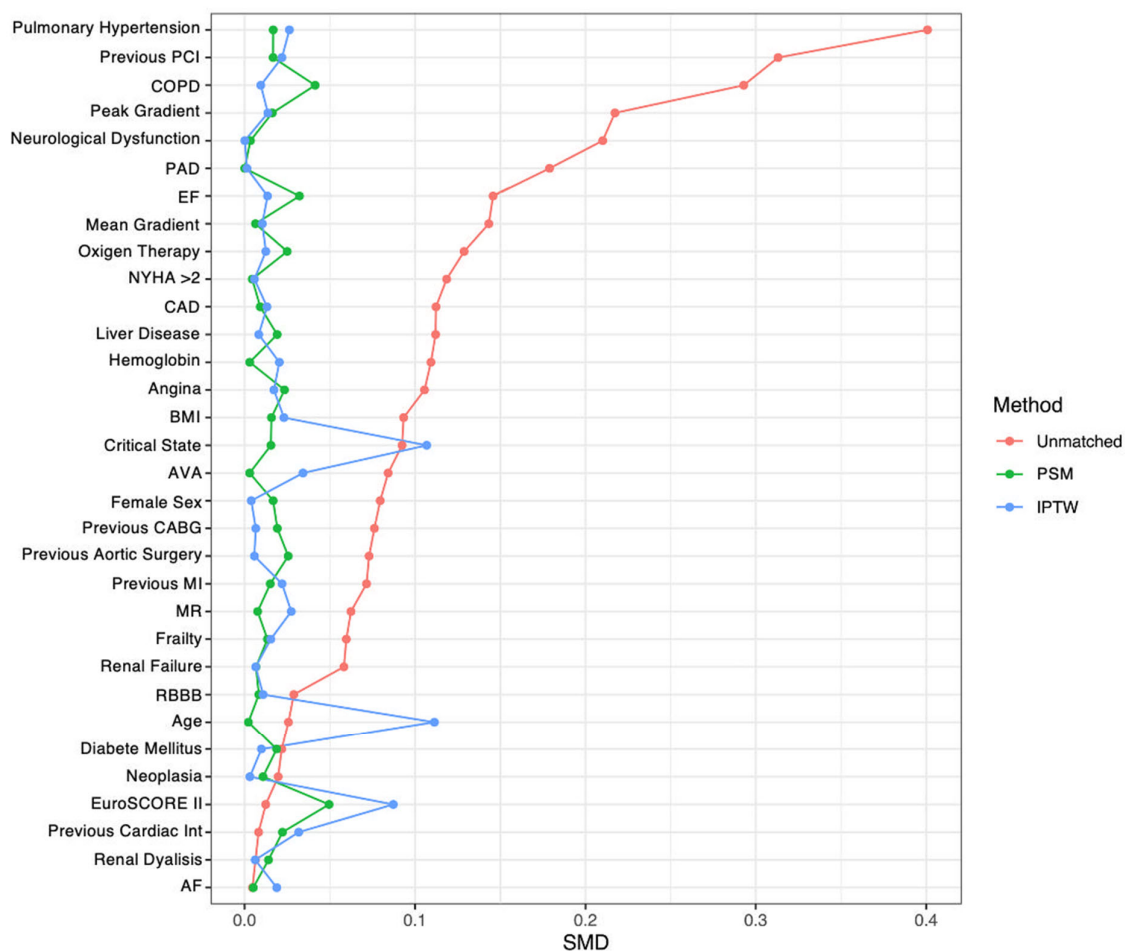

**Figure S1.** Balance of standardized mean differences among baseline variables before and after adjustment.

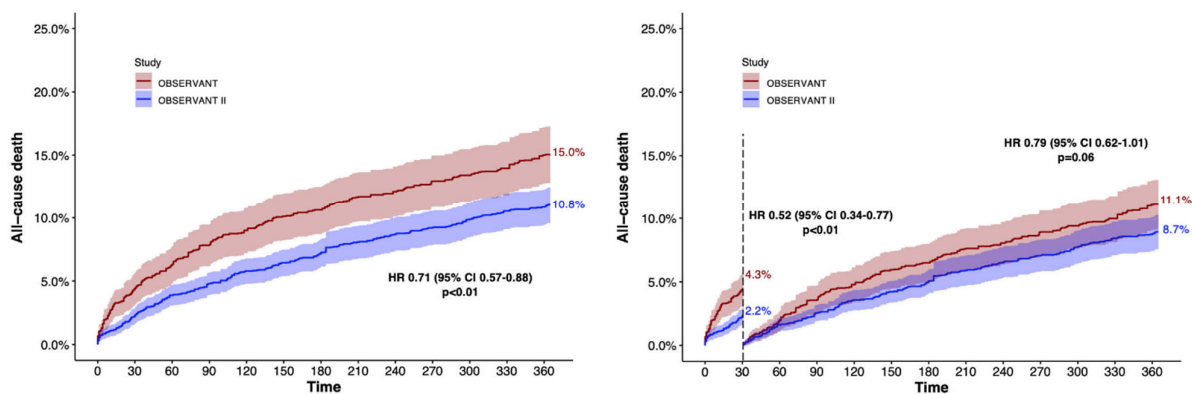

**Figure S2.** One-year Kaplan-Meier survival curve and landmark analysis for all-cause death in the transfemoral cohort after inverse propensity of treatment weighting adjustment.

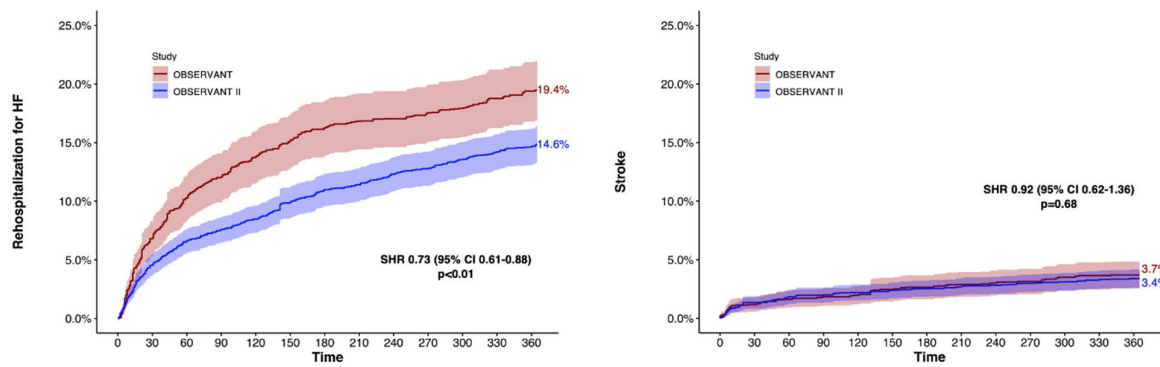

**Figure S3.** One-year Fine and Gray cumulative incidence analysis for rehospitalization for heart failure and stroke in the transfemoral cohort after inverse propensity of treatment weighting adjustment.

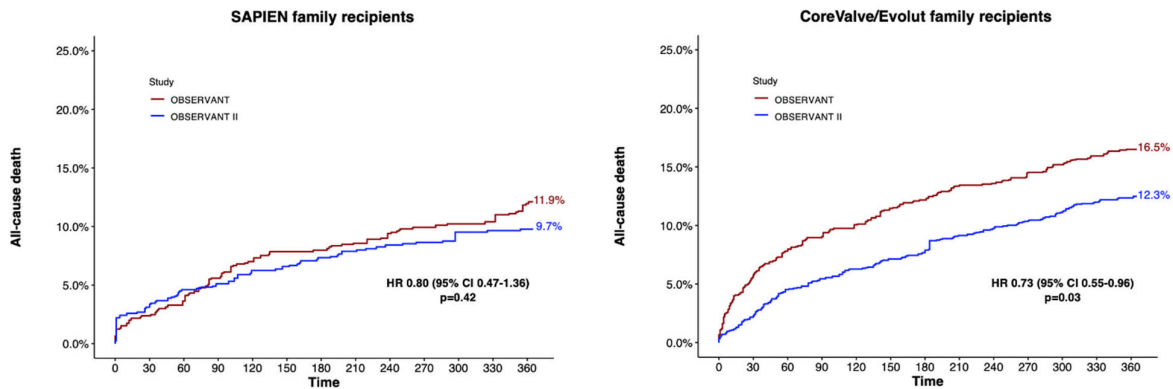

**Figure S4.** One-year Kaplan-Meier survival curves for all-cause death in patients receiving SAPIEN family or CoreValve/Evolut family devices after independent inverse propensity of treatment weighting adjustment.

**Table S1.** Procedural characteristics after inverse probability of treatment weighting (IPTW) and propensity score matching (PSM) adjustment.

|                           | IPTW adjustment   |                      |                 | PSM adjustment    |                      |                 |
|---------------------------|-------------------|----------------------|-----------------|-------------------|----------------------|-----------------|
|                           | OBS<br>(n = 1811) | OBS II<br>(n = 2939) | <i>p</i> -value | OBS<br>(n = 1451) | OBS II<br>(n = 1451) | <i>p</i> -value |
| Concomitant PCI, n (%)    | 69 (3.8)          | 170 (5.8)            | 0.022           | 46 (3.2)          | 74 (5.1)             | 0.012           |
| General Anesthesia, n (%) | 661 (36.5)        | 535 (18.2)           | <0.01           | 514 (35.4)        | 257 (17.7)           | <0.01           |
| Approach, n (%)           |                   |                      | <0.01           |                   |                      | <0.01           |
| Transfemoral              | 1492 (82.4)       | 2672 (90.9)          |                 | 1193 (82.2)       | 1318 (90.8)          |                 |
| Transapical               | 243 (13.4)        | 126 (4.3)            |                 | 195 (13.4)        | 65 (4.5)             |                 |
| Transaxillary             | 58 (3.2)          | 120 (4.1)            |                 | 51 (3.5)          | 59 (4.1)             |                 |
| Others                    | 16 (0.9)          | 24 (0.8)             |                 | 12 (0.8)          | 9 (0.6)              |                 |
| Devices, n (%)            |                   |                      | <0.01           |                   |                      | <0.01           |
| Not available             | 65 (3.6)          | 9 (0.3)              |                 | 57 (3.9)          | 3 (0.2)              |                 |
| Sapien XT                 | 842 (46.5)        | 141 (4.8)            |                 | 676 (46.6)        | 72 (5.0)             |                 |
| CoreValve                 | 904 (49.9)        | 44 (1.5)             |                 | 718 (49.5)        | 17 (1.2)             |                 |
| Sapien 3                  | 0.0 (0.0)         | 779 (26.5)           |                 | 0 (0.0)           | 376 (25.9)           |                 |
| Evolut R                  | 0.0 (0.0)         | 1137 (38.7)          |                 | 0 (0.0)           | 559 (38.5)           |                 |
| Evolut PRO                | 0.0 (0.0)         | 335 (11.4)           |                 | 0 (0.0)           | 175 (12.1)           |                 |
| Acurate Neo               | 0.0 (0.0)         | 288 (9.8)            |                 | 0 (0.0)           | 144 (9.9)            |                 |
| Portico                   | 0.0 (0.0)         | 188 (6.4)            |                 | 0 (0.0)           | 97 (6.7)             |                 |
| Lotus                     | 0.0 (0.0)         | 12 (0.4)             |                 | 0 (0.0)           | 4 (0.3)              |                 |
| Engage                    | 0.0 (0.0)         | 6 (0.2)              |                 | 0 (0.0)           | 4 (0.3)              |                 |

Abbreviations: IPTW, inverse probability of treatment weighting; PCI, percutaneous coronary intervention; PSM, propensity score matching.

**Table S2.** In-hospital outcomes after inverse probability of treatment weighting (IPTW) and propensity score matching (PSM) adjustment.

|                                              | IPTW adjustment     |                      |         | PSM adjustment      |                      |         |
|----------------------------------------------|---------------------|----------------------|---------|---------------------|----------------------|---------|
|                                              | OBS<br>(n = 1811)   | OBS II<br>(n = 2939) | p-value | OBS<br>(n = 1451)   | OBS II<br>(n = 1451) | p-value |
| Prosthesis migration, n (%)                  | 24 (1.3)            | 41 (1.4)             | 0.937   | 22 (1.5)            | 24 (1.7)             | 0.882   |
| Myocardial infarction, n (%)                 | 16 (0.9)            | 9 (0.3)              | 0.011   | 13 (0.9)            | 3 (0.2)              | 0.021   |
| Tamponade, n (%)                             | 81 (4.5)            | 29 (1.0)             | <0.01   | 70 (4.8)            | 14 (1.0)             | <0.01   |
| Vascular injury, n (%)                       | 114 (6.3)           | 71 (2.4)             | <0.001  | 90 (6.2)            | 35 (2.4)             | <0.001  |
| Complication of left ventricular apex, n (%) | 14 (0.8)            | 3 (0.1)              | <0.001  | 13 (0.9)            | 2 (0.1)              | 0.007   |
| Permanent pacemaker implantation, (%)        | 270 (14.9)          | 388 (13.2)           | 0.142   | 221 (15.2)          | 189 (13.0)           | 0.098   |
| Conversion to open surgery, n (%)            | 7 (0.4)             | 9 (0.3)              | 0.316   | 9 (0.6)             | 4 (0.3)              | 0.266   |
| Stroke, n (%)                                | 20 (1.1)            | 18 (0.6)             | 0.075   | 18 (1.2)            | 8 (0.6)              | 0.074   |
| Shock, n (%)                                 | 49 (2.7)            | 38 (1.3)             | 0.006   | 42 (2.9)            | 20 (1.4)             | 0.007   |
| Blood transfusion, n (%)                     | 587 (32.4)          | 514 (17.5)           | <0.001  | 465 (32.0)          | 278 (19.2)           | <0.001  |
| Acute kidney injury, n (%)                   | 120 (6.6)           | 41 (1.4)             | <0.001  | 71 (4.9)            | 22 (1.5)             | <0.001  |
| Infection, n (%)                             | 107 (5.9)           | 144 (4.9)            | 0.205   | 88 (6.1)            | 79 (5.4)             | 0.524   |
| Paravalvular regurgitation, n (%)            |                     |                      | 0.013   |                     |                      | 0.027   |
| None/trivial                                 | 933 (51.5)          | 1614 (54.9)          |         | 748 (51.6)          | 806 (55.5)           |         |
| Mild                                         | 688 (38.0)          | 1102 (37.5)          |         | 551 (38.0)          | 529 (36.5)           |         |
| Moderate                                     | 177 (9.8)           | 215 (7.3)            |         | 141 (9.7)           | 112 (7.7)            |         |
| Severe                                       | 13 (0.7)            | 9 (0.3)              |         | 11 (0.8)            | 4 (0.3)              |         |
| Aortic valve peak gradient, median (IQR)     | 19.0<br>(13.0–22.0) | 15.0<br>(10.8–19.0)  | <0.001  | 19.0<br>(13.0–21.5) | 15.0<br>(11.0–20.0)  | <0.001  |
| Aortic valve mean gradient, median (IQR)     | 10.0<br>(7.0–12.0)  | 8.0<br>(5.0–11.0)    | <0.001  | 10.0<br>(7.0–11.0)  | 8.0<br>(5.0–11.0)    | <0.001  |
| ICU length of stay, median (IQR)             | 2.00 (1.00, 3.00)   | 1.0<br>(0.0–2.0)     | <0.001  | 2.0<br>(1.0–3.0)    | 1.0<br>(0.0–2.0)     | <0.001  |
| Monitored ward length of stay, median (IQR)  | 0.00<br>(0.0–3.0)   | 1.0<br>(0.0–3.0)     | <0.001  | 0.0<br>(0.0–3.0)    | 1.0<br>(0.0–3.0)     | <0.001  |
| Hospital length of stay, median (IQR)        | 11.0<br>(8.0–17.0)  | 9.0<br>(6.0–14.0)    | <0.001  | 10.0<br>(8.0–16.0)  | 9.0<br>(6.0–14.0)    | <0.001  |

Abbreviations: IPTW, inverse probability of treatment weighting; PSM, propensity score matching.

**Table S3.** Landmark analyses for all-cause death after inverse probability of treatment weighting (IPTW) and propensity score matching (PSM) adjustment.

|                        | OBS            | OBS II         | HR (95%CI)       | p-value |
|------------------------|----------------|----------------|------------------|---------|
| <b>IPTW adjustment</b> | <b>N= 1811</b> | <b>N= 2939</b> |                  |         |
| From 0 to 30 days      | 5.0%           | 2.2%           | 0.45 (0.30–0.65) | <0.01   |
| From 30 days to 1 year | 11.8%          | 8.5%           | 0.71 (0.57–0.88) | <0.01   |
| <b>PSM adjustment</b>  | <b>N= 1451</b> | <b>N= 1451</b> |                  |         |
| From 0 to 30 days      | 4.9%           | 2.3%           | 0.48 (0.32–0.72) | <0.01   |
| From 30 days to 1 year | 11.8%          | 8.9%           | 0.74 (0.59–0.94) | 0.012   |

Abbreviations: IPTW, inverse probability of treatment weighting; PSM, propensity score matching.

**Table S4.** One-year outcomes after inverse probability of treatment weighting (IPTW) and propensity score matching (PSM) adjustment in the transfemoral approach cohort.

|                          | OBS             | OBS II          | HR/SHR (95%CI)   | p-value |
|--------------------------|-----------------|-----------------|------------------|---------|
| <b>IPTW adjustment</b>   | <b>N = 1450</b> | <b>N = 2511</b> |                  |         |
| All-cause death          | 15.0%           | 10.8%           | 0.71 (0.57–0.88) | 0.001   |
| Rehospitalization for HF | 19.4%           | 14.6%           | 0.73 (0.61–0.88) | 0.001   |
| Stroke                   | 3.7%            | 3.4%            | 0.92 (0.62–1.36) | 0.677   |
| PPI                      | 18.7%           | 17.4%           | 0.94 (0.78–1.13) | 0.495   |
| MI                       | 1.8%            | 1.7%            | 0.91 (0.54–1.53) | 0.710   |
| <b>PSM adjustment</b>    | <b>N = 1163</b> | <b>N = 1163</b> |                  |         |
| All-cause death          | 14.7%           | 11.3%           | 0.76 (0.61–0.95) | 0.017   |
| Rehospitalization for HF | 19.9%           | 15.1%           | 0.74 (0.61–0.89) | 0.002   |
| Stroke                   | 4.0%            | 3.4%            | 0.85 (0.55–1.30) | 0.446   |
| PPI                      | 18.8%           | 18.6%           | 1.00 (0.83–1.21) | 0.961   |
| MI                       | 1.7%            | 1.8%            | 1.05 (0.57–1.94) | 0.878   |

Abbreviations: CI, confidence interval; HF, heart failure; HR, hazard ratio; MI, myocardial infarction; PPI, permanent pacemaker implantation; PSM, propensity score matching; SHR, sub-distribution hazard ratio.

**Table S5.** Landmark analyses for all-cause death after inverse probability of treatment weighting (IPTW) and propensity score matching (PSM) adjustment in the transfemoral approach cohort.

|                        | OBS             | OBS II          | HR (95%CI)       | p-value |
|------------------------|-----------------|-----------------|------------------|---------|
| <b>IPTW adjustment</b> | <b>N = 1450</b> | <b>N = 2511</b> |                  |         |
| From 0 to 30 days      | 4.3%            | 2.2%            | 0.52 (0.34–0.77) | 0.001   |
| From 30 days to 1 year | 11.1%           | 8.7%            | 0.79 (0.62–1.01) | 0.063   |
| <b>PSM adjustment</b>  | <b>N = 1163</b> | <b>N = 1163</b> |                  |         |
| From 0 to 30 days      | 4.1%            | 2.4%            | 0.59 (0.38–0.94) | 0.024   |
| From 30 days to 1 year | 10.9%           | 9.0%            | 0.83 (0.64–1.07) | 0.155   |

Abbreviations: IPTW, inverse probability of treatment weighting; PSM, propensity score matching.

**Table S6.** One-year all-cause death in TF-TAVI patients receiving SAPIEN family or CoreValve/Evolut family transcatheter aortic valves after independent inverse propensity of treatment weighting (IPTW) adjustment.

|                                         | OBS             | OBS II           | HR (95%CI)       | p-value |
|-----------------------------------------|-----------------|------------------|------------------|---------|
| SAPIEN family TAVs recipients           | 11.9% (n = 598) | 9.7% (n = 675)   | 0.80 (0.47–1.36) | 0.418   |
| CoreValve/Evolut family TAVs recipients | 16.5% (n = 832) | 12.3% (n = 1352) | 0.73 (0.55–0.96) | 0.026   |

Abbreviations: HR, hazard ratio; TAVs, transcatheter aortic valves.

**Table S7.** Multivariate logistic regression analysis of procedural and post-procedural variables associated with all-cause death at 1 year.

|                                       | <b>Odds Ratio</b>  | <b><i>p</i>-value</b> |
|---------------------------------------|--------------------|-----------------------|
| OBSERVANT II study                    | 0.76 (0.64–0.92)   | 0.016                 |
| Transfemoral approach                 | 0.79 (0.60–1.05)   | 0.304                 |
| Moderate-to-severe PVR                | 1.40 (1.06–1.83)   | 0.041                 |
| Permanent pacemaker implantation      | 1.21 (0.94–1.53)   | 0.204                 |
| Acute kidney injury                   | 3.93 (2.83–5.44)   | <0.001                |
| Vascular injury                       | 1.47 (1.00–2.11)   | 0.107                 |
| Stroke                                | 11.75 (6.13–23.43) | <0.001                |
| Myocardial infarction                 | 7.51 (3.41–16.96)  | <0.001                |
| Device Migration                      | 1.08 (0.51–2.10)   | 0.857                 |
| Complication of left ventricular apex | 1.32 (0.42–3.74)   | 0.619                 |
| Coronary Artery Disease               | 1.16 (0.78–1.69)   | 0.542                 |
| General anesthesia                    | 1.02 (0.81–1.28)   | 0.909                 |
| Conversion to surgery                 | 21.35 (6.48–97.74) | <0.001                |
| Infection                             | 1.57 (1.12–2.16)   | 0.022                 |
| Blood transfusion                     | 1.23 (1.00–1.50)   | 0.141                 |

Abbreviations: PVR: paravalvular regurgitation.



## **OBSERVANT II RESEARCH GROUP**

### *Coordination*

Fulvia Seccareccia, Paola D'Errigo, Stefano Rosato, Gabriella Badoni. National Centre for Global Health - Istituto Superiore di Sanità, Rome, Italy;

### *Collaborators for the "Ricerca Finalizzata 2016" (PE-2016-02364619)*

Corrado Tamburino (PI), Davide Capodanno (Co-PI), Marco Barbanti. A.O.U. Policlinico "G. Rodolico – San Marco" – University of Catania, Catania, Italy

Fausto Biancari. Helsinki University Hospital and University of Helsinki, Helsinki, Finland; Oulu University Hospital, Oulu, Finland

Giovanni Baglio, Francesco Cerza. Agenzia Nazionale per i Servizi Sanitari Regionali (Age.Na.S) – PNE, Rome, Italy

Andrea Marcellusi. Faculty of Economics, University of Rome "Tor Vergata", Rome, Italy

### *Representatives of the Scientific Societies*

- IFC - Italian Federation of Cardiology

Gennaro Santoro. Fondazione "G. Monasterio" CNR/Tuscany Region for the Medical Research and Public Health, Massa, Italy

Gian Paolo Ussia. Campus Bio-Medico University of Rome, Rome, Italy

- GISE – Italian Society of Interventional Cardiology

Giuseppe Musumeci. S. Croce e Carle Hospital, Cuneo

Francesco Bedogni. IRCCS Policlinico S. Donato, S. Donato Milanese, Milan, Italy

Sergio Berti. Fondazione "G. Monasterio" CNR/Tuscany Region for the Medical Research and Public Health, Massa, Italy

Giuseppe Tarantini. University of Padova, Padova, Italy

- ITACTA - Italian Association of Cardiothoracic Anesthesia

Massimo Baiocchi. Policlinico Sant'Orsola, Bologna, Italy

Marco Ranucci. IRCCS Policlinico S. Donato, S. Donato Milanese, Milan, Italy

### *Institutional collaborations*

- National

Domenico Mantoan. Agenzia Nazionale per i Servizi Sanitari Regionali (Age.Na.S), Rome, Italy

- Italian Regional Authorities

Rossana De Palma. Emilia Romagna Region

Salvatore Scondotto. Sicily Region

Anna Orlando. Piemonte Region

### Participating hemodynamic centers

1. A.O.U. Città della Salute e della Scienza di Torino (TO) - Mauro Rinaldi, Stefano Salizzoni
2. A.O. S. Croce e Carle (CN) - Giuseppe Musumeci, Giorgio Baralis
3. A.O. SS. Antonio e Biagio e Cesare Arrigo (AL) - Gianfranco Pistis, Maurizio Reale
4. I.R.C.C.S Policlinico San Donato (San Donato Milanese - MI) - Francesco Bedogni, Giovanni Bianchi
5. I.R.C.C.S Multimedica (Sesto San Giovanni - MI) - Flavio Airoidi, Iassen Michev
6. Fondazione I.R.C.C.S. Policlinico San Matteo (PV) - Maurizio Ferrario, Umberto Canosi
7. ASST Lecco - Ospedale "A. Manzoni" (LC) - Luigi Piatti, Gianluca Tiberti
8. ASST degli Spedali Civili - Presidio Ospedaliero di Brescia (BS) - Federica Etori (retired), Salvatore Curello, Marianna Adamo
9. I.R.C.C.S Ospedale San Raffaele (MI) - Antonio Colombo, Matteo Montorfano, Marco Ancona,
10. ASST Monza & Brianza - Ospedale S. Gerardo (MB) - Virgilio Colombo, Ivan Calchera
11. Fondazione Poliambulanza (BS) - Ornella Leonzi, Diego Maffeo
12. ASST Papa Giovanni XXIII (BG) - Orazio Valsecchi, Federica Roncali, Angelina Vassileva
13. Policlinico di Monza (MB) - Filippo Scalise, Giovanni Sorropago
14. A.O. di Padova - Centro Gallucci (PD) - Giuseppe Tarantini, Alessandro Schiavo
15. Hesperia Hospital (MO) - Giuseppe D'Anniballe, Davide Gabbieri
16. A.O.U. di Parma (PR) - Luigi Vignali, Michela Bollettino
17. A.O.U. Careggi (FI) - Carlo Di Mario, Francesco Meucci
18. A.O.U. Senese - Ospedale Santa Maria alle Scotte (SI) - Carlo Pierli (retired), Massimo Fineschi, Alessandro Iadanza
19. Fondazione Toscana Gabriele Monasterio - Ospedale del Cuore "G. Pasquinucci" (MS) - Sergio Berti, Giuseppa Lo Surdo
20. Ospedale San Filippo Neri (RM) - Giulio Speciale, Andrea Bisciglia
21. Fondazione Policlinico Universitario Agostino Gemelli IRCCS - Università Cattolica del Sacro Cuore (RM) - Carlo Trani, Diana Verdirosi
22. A.O. San Camillo Forlanini (RM) - Roberto Violini, Laura Zappavigna
23. A.O. San Giuseppe Moscati (AV) - Emilio Di Lorenzo, Michele Capasso
24. A.O.U. Federico II (NA)- Giovanni Esposito, Fabio Magliulo
25. A.O.U. OO.RR. San Giovanni di Dio e Ruggi d'Aragona (SA) - Pietro Giudice, Tiziana Attisano
26. A.O.U.C. Policlinico di Bari (BA) - Alessandro Santo Bortone, Emanuela De Cillis
27. A.O.U. Policlinico-Vittorio Emanuele, Università di Catania (CT) - Corrado Tamburino, Marco Barbanti
28. Centro Cuore Morgagni - Pedara (CT) - Sebastiano Immè, Martina Patanè

### OBSERVANT I RESEARCH GROUP

The **Research Group and participating centers of the OBSERVANT I study** have been previously listed in: Barbanti M, Tamburino C, D'Errigo P, et al. Five-year outcomes of transfemoral transcatheter aortic valve replacement or surgical aortic valve replacement in a real world population. *Circ Cardiovasc Interv.* 2019;12:e007825 - Supplemental Material.
